# Supplementary material for: Continuous flow synthesis of amines from the cascade reactions of nitriles and carbonyl-containing compounds promoted by Pt-modified titania catalysts
Source: Royal Society of Chemistry journal article supplement (doi:10.1039/c8gc03037e), 2018-11-29
Supplement: c8gc03037e1.pdf [file c8gc03037e1.pdf]

## Supporting Information

### Continuous flow amines formation from cascade reactions of nitriles and carbonyl containing compounds by simple Pt-modified titania catalyst

Cevher Altuğ,<sup>a,b\*</sup> Mario J. Muñoz-Batista<sup>b\*</sup> Daily Rodríguez-Padrón,<sup>b\*</sup> Alina M. Balu,<sup>b</sup> Antonio A. Romero,<sup>b</sup> Rafael Luque.<sup>b,c\*</sup>

<sup>a</sup> Department of Chemistry, Bolu Abant İzzet Baysal University, 14030 Bolu-Turkey

<sup>b</sup> Departamento de Química Orgánica, Universidad de Córdoba, Campus de Rabanales, Edificio Marie Curie (C-3), Ctra Nnal IV-A, Km 396, E14014, Córdoba, Spain. \* D.R.P [dailydags@gmail.com](mailto:dailydags@gmail.com), R.L. [rafael.luque@uco.es](mailto:rafael.luque@uco.es)

<sup>c</sup> Peoples Friendship University of Russia (RUDN University), 6 Miklukho-Maklaya Str., 117198, Moscow, Russia

\*These authors contribute equally to the work

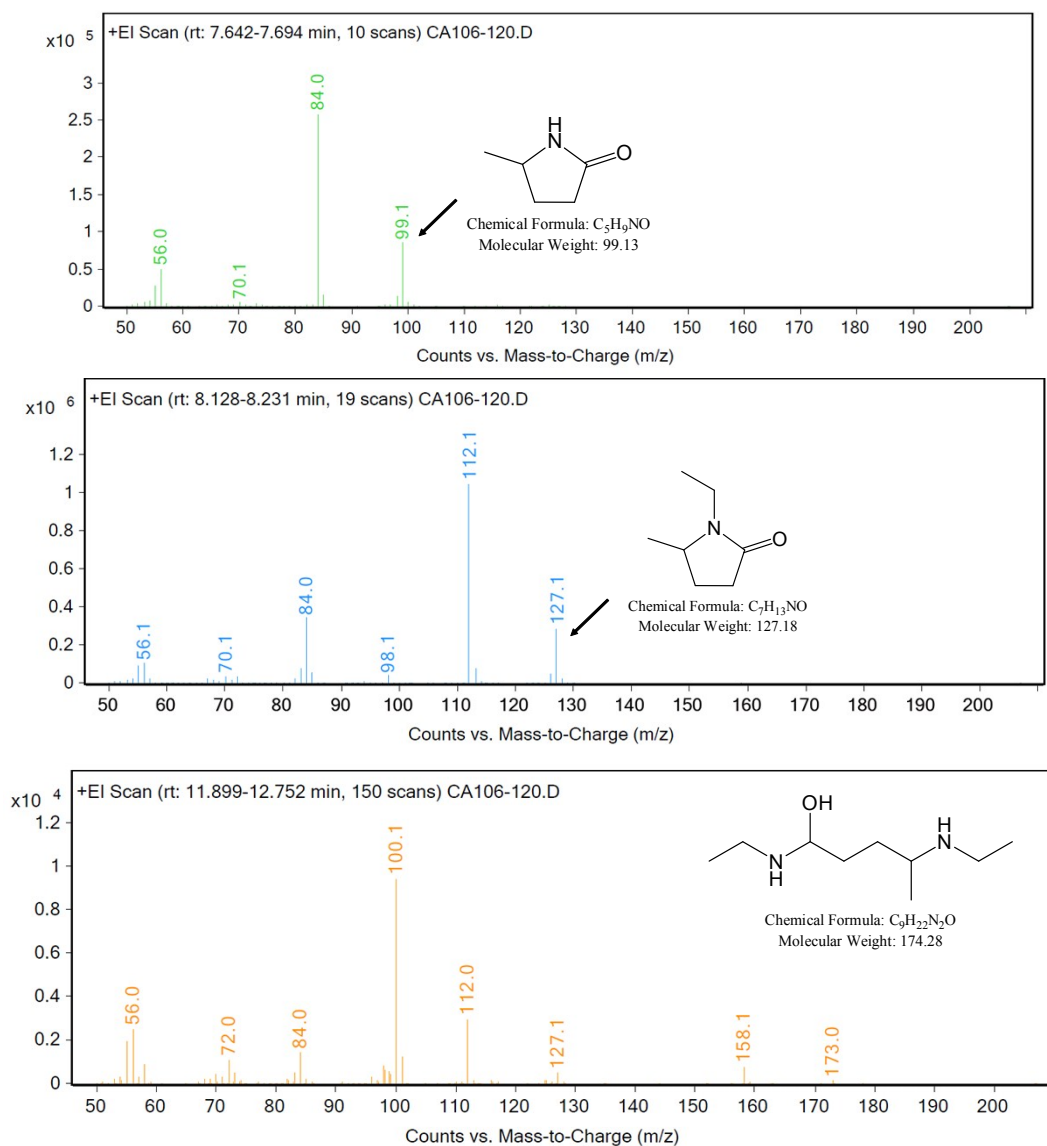

Figure S1. MS spectra of the obtained products in the continuous flow reaction of levulinic acid with acetonitrile.

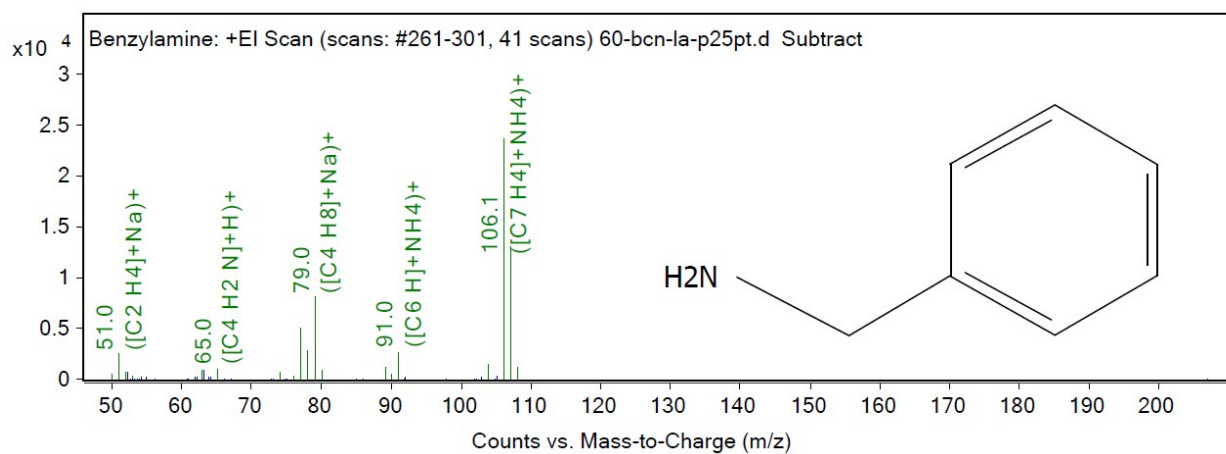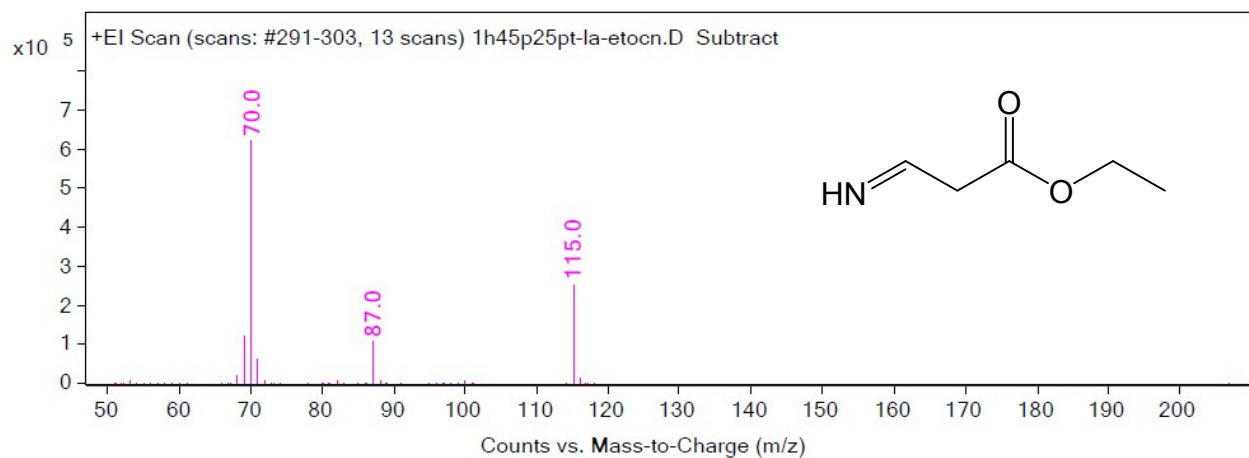

Figure S2. MS spectra of the reduced products of benzonitrile and ethylcyanoacetate.

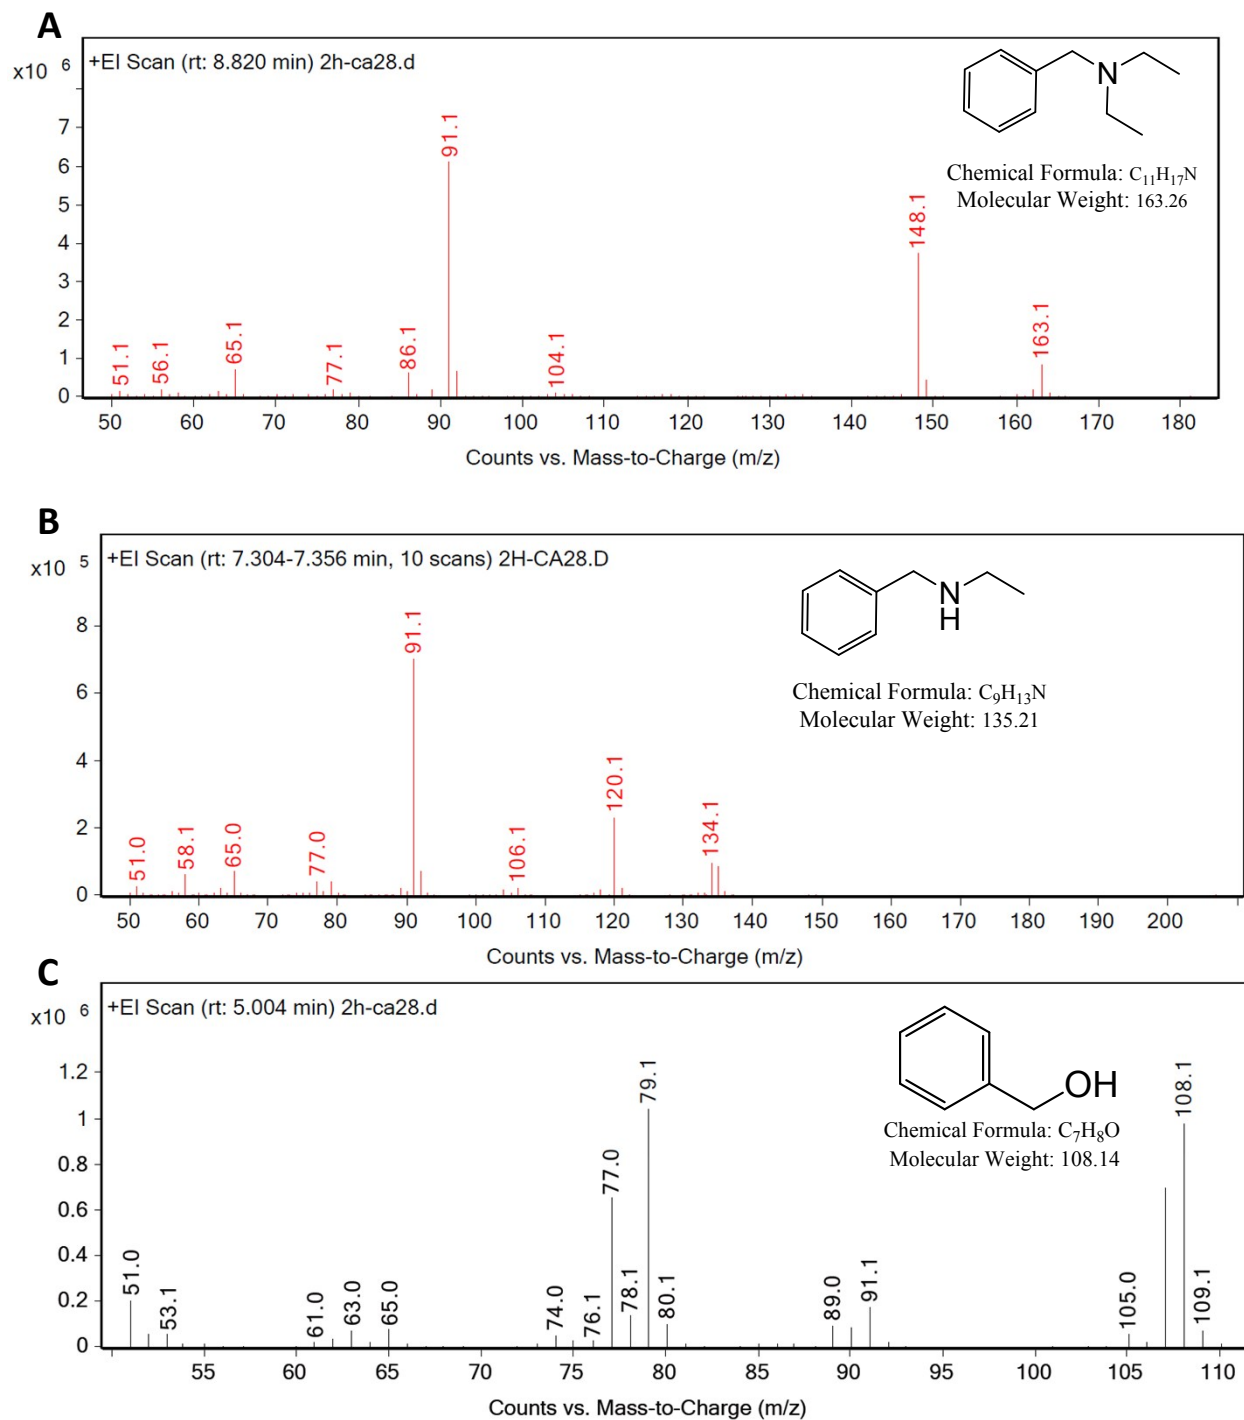

Figure S3. MS spectra of the obtained products in the continuous flow reaction of benzaldehyde with acetonitrile.

**A**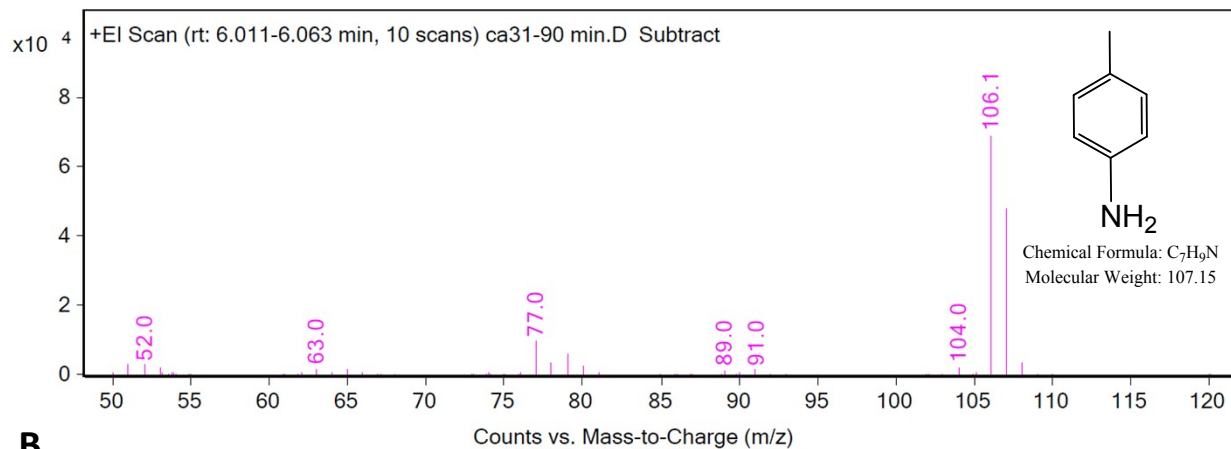**B**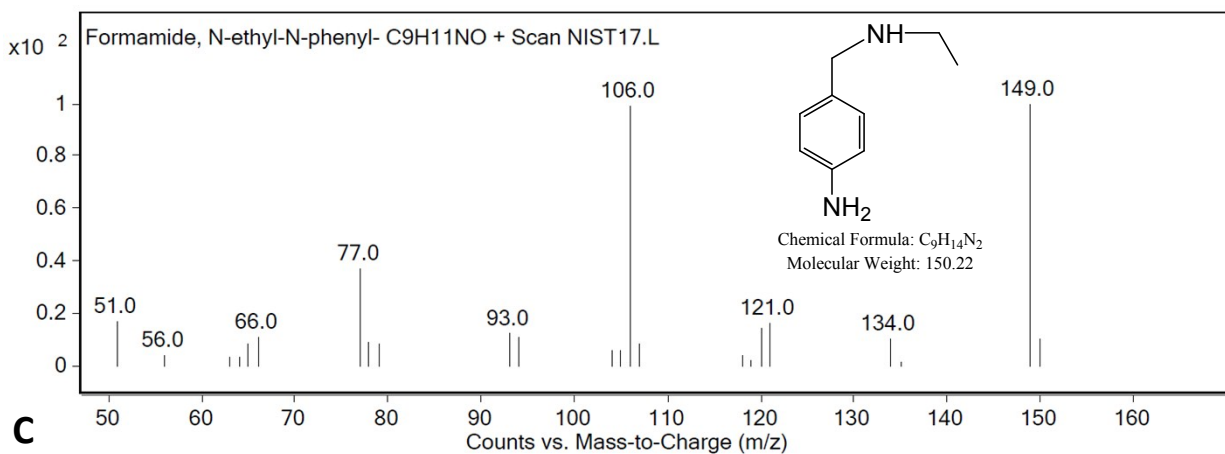**C**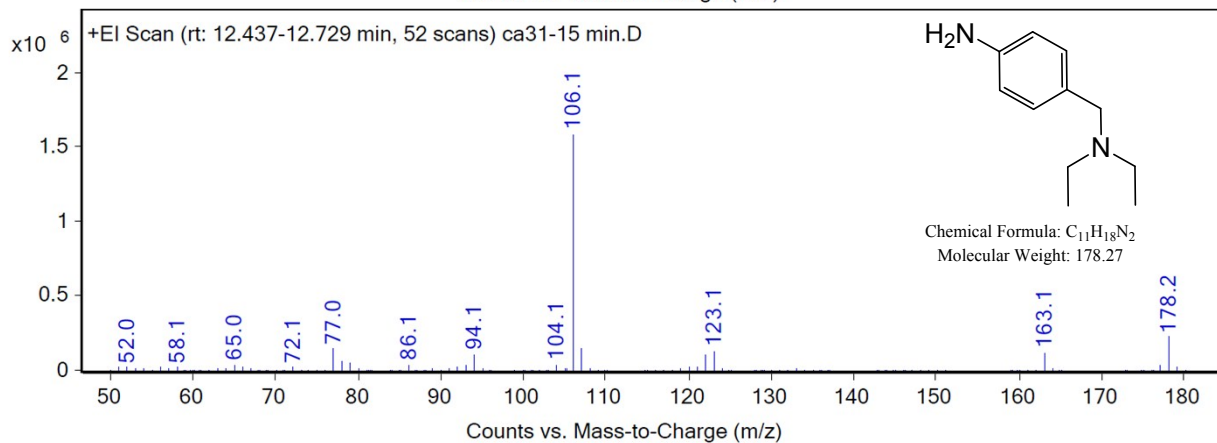

Figure S4. MS spectra of the obtained products in the continuous flow reaction of *p*-nitro-benzaldehyde with acetonitrile.

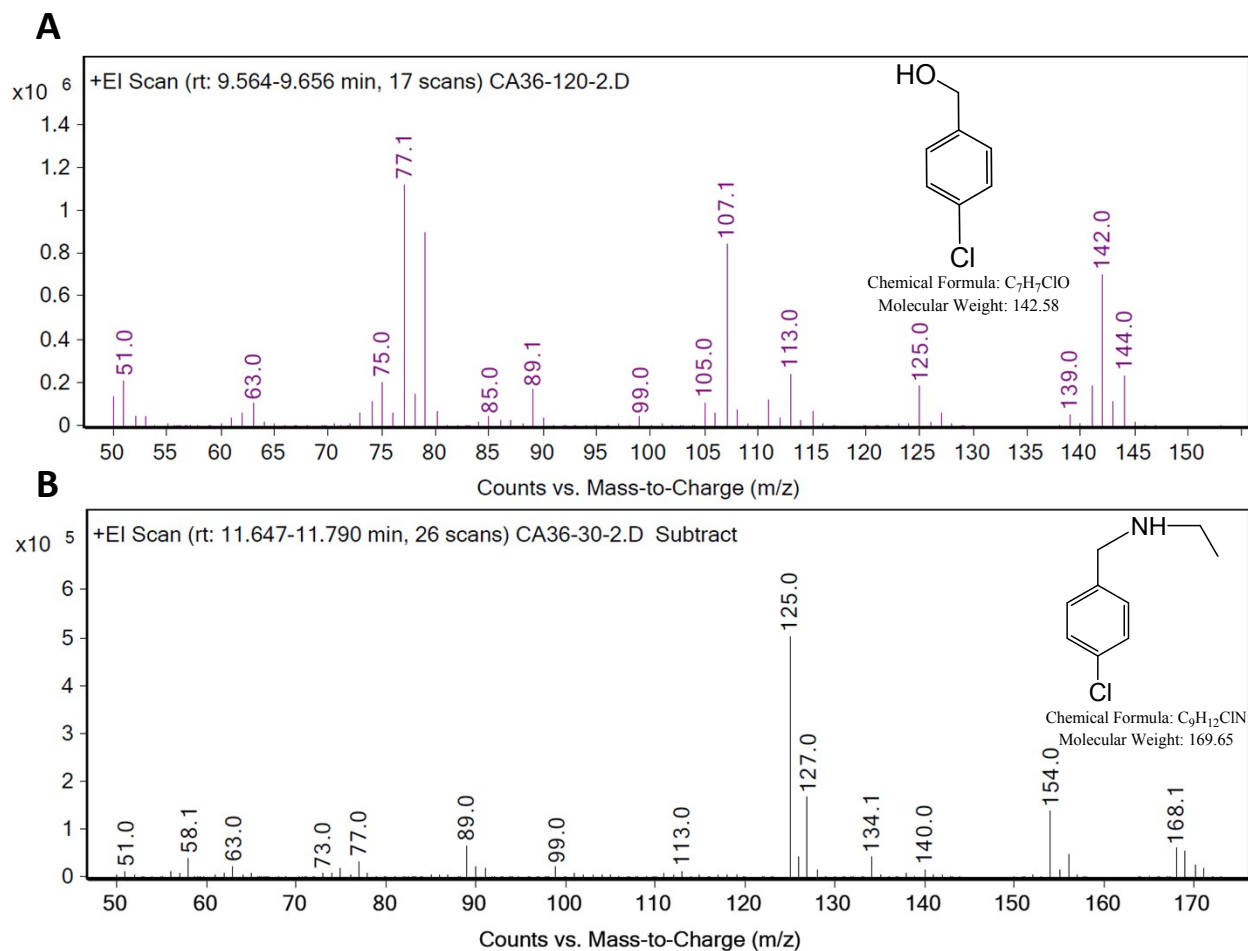

Figure S5. MS spectra of the obtained products in the continuous flow reaction of *p*-chloro-benzaldehyde, with acetonitrile.

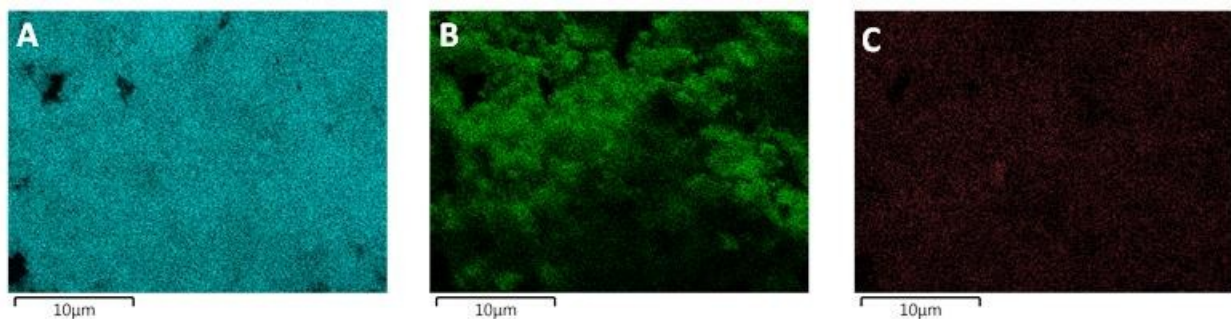

Figure S6. EDX elemental analysis for (A) Ti, (B) O and (C) Pt.
